# Supplementary material
Source: MDPI journal article supplement (https://www.mdpi.com/2673-9992/15/1/13)
Supplement: s1 [file s1 › msf-2145889-supplementary.pdf]

## Engaging the global dental profession to help tackle antibiotic resistance – Led by Dr Wendy Thompson

### Project Overview

In the pre-antibiotic era, death from oral and dental infections were common.<sup>1</sup> Dentists are responsible for around 10% of antibiotic prescribing across human healthcare globally.<sup>2</sup>

During 2020, dental antibiotic prescribing increased dramatically due to COVID-19 pandemic restrictions on dental procedures which are vital to prevent and manage dental infections.<sup>3</sup> In response, FDI World Dental Federation published a framework about the essential role of dental teams in tackling antibiotic resistance.<sup>2</sup>

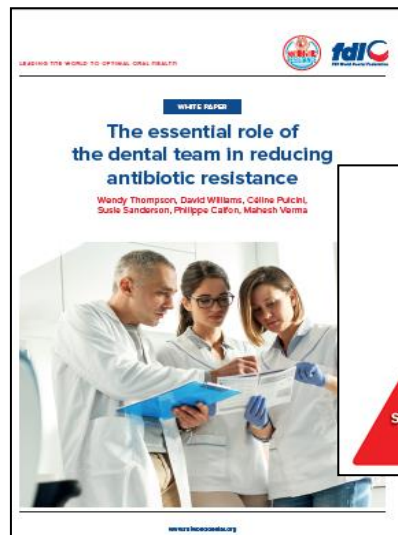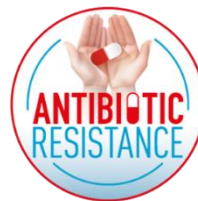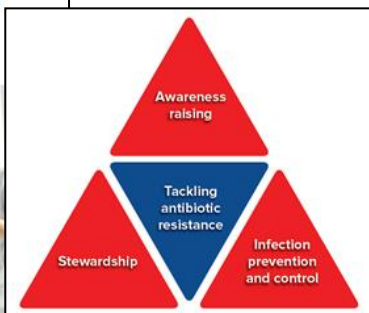

### Project impact

#### Engaging individuals

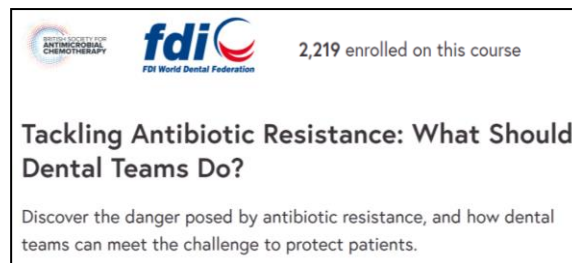

#### Engaging organisations

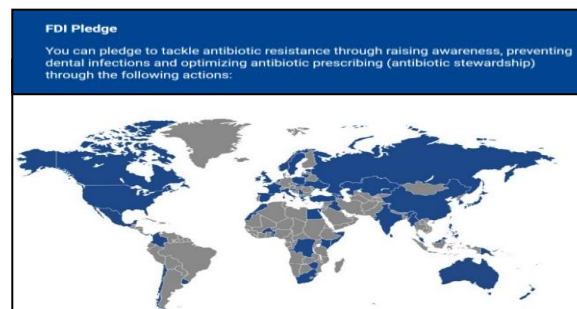

#### Engaging academics

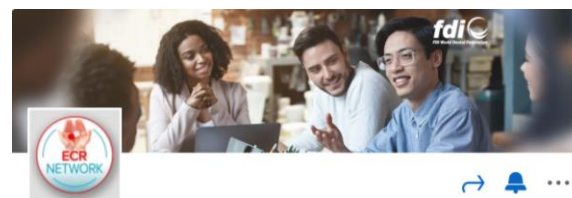

GARD Network for Early Career Researchers

### Future developments

- A set of posters, leaflets and videos highlighting the benefits of managing dental pain and infection without antibiotics will aim to reduce professional intention to prescribe and public desire for antibiotics by tackling the erroneous yet widespread perception that antibiotics are necessary and appropriate for treating acute dental problems.<sup>4</sup>
- A celebratory event for signatories of FDI's pledge is planned for World Dental Congress (Sydney 2023) to encourage a wider range of signatories, including from dental businesses and charities.
- FDI will continue to use its influence to encourage the inclusion of dentistry within national action plans on AMR and vice versa (AMR within oral health plans).
- A focus on international research collaboration with mentoring for early career researchers will be the future direction for FDI's Global Antimicrobial Research in Dentistry (GARD) network. This will build on our initial work about dental antibiotic stewardship.<sup>5</sup>

**References:** 1. Appleby & Stahl-Timmins. Consumption, flux, and dropsy: counting deaths in 17th century London Br Med J 2018; 363. 2. Thompson et al. The essential role of the dental team in reducing antibiotic resistance. Geneva: FDI World Dental Federation; 2020. 3. [www.fdiworlddental.org/study-shows-dramatic-rise-antibiotics-prescribed-dental-patients-england-during-covid-19-lockdown](http://www.fdiworlddental.org/study-shows-dramatic-rise-antibiotics-prescribed-dental-patients-england-during-covid-19-lockdown). 4. Emmott et al. Antibiotics and toothache: a social media review, Int J Pharm Pract. 2021. 29(3): 210–217. 5. Thompson et al. Dental antibiotic stewardship: study protocol for developing international consensus on a core outcome set. Trials 2022. 23: 116.

**Acknowledgements:** Initial support was provided by GSK Consumer Healthcare.
